# Supplementary material for: Constitutive Serotonin Tone as a Modulator of Brown Adipose Tissue Thermogenesis: A Rat Study
Source: MDPI journal article supplement (doi:10.3390/life13071436), 2023-06-25
Supplement: s1 [file s1]

## Supplementary material

**Table S1.** Primer sequences used in RT-qPCR analysis.

| NCBI Symbol     | Gene                                             | Forward primer sequence | Reverse primer sequence |
|-----------------|--------------------------------------------------|-------------------------|-------------------------|
| <b>Actb</b>     | Actin beta                                       | GCGCAAGTACTCTGTGTGGA    | GGCATCATTGACGACATCGAG   |
| <b>Adipoq</b>   | Adiponectin                                      | GAGACGCAGGTGTTCTTG      | CCTACGCTGAATGCTGAG      |
| <b>Atgl</b>     | Adipose triglyceride lipase                      | AGACTGTCTGAGCAGGTGGA    | AGTAGCTGACGCTGGCATTG    |
| <b>Cebpb</b>    | CCAAT enhancer binding protein beta              | GACAAGCTGAGCGACGAGTA    | AGCTGCTCCACCTTCTTCTG    |
| <b>Cidea</b>    | Cell Death Inducing DFFA Like Effector A         | TGACATTCATGGGGTTGCAGA   | GGCCAGTTGTGATGACCAAGA   |
| <b>Dio2</b>     | Iodothyronine deiodinase 2                       | AGAAGTGGGAGTTGGCTTCG    | ACTCTCTGACCGGATGACGA    |
| <b>Fasn</b>     | Fatty acid synthase                              | GGTAGGCTTGGTGAAGTGTCTC  | TCTAACTGGAAGTGACGGAAGG  |
| <b>Fgf21</b>    | Fibroblast growth factor 21                      | AGGCTTTGACACCCAGGATT    | ACAGATGACGACCAAGGACAC   |
| <b>Glut4</b>    | Glucose transporter 4                            | ATCAACGCCCCACAGAAAGT    | CCTGCCTACCCAGCCAAGT     |
| <b>Hes1</b>     | Hes family bHLH transcription factor 1           | CGACACCGGACAAACCAAA     | GAATGTCTGCCTTCTCCAGCTT  |
| <b>Notch1</b>   | Neurogenic locus notch homolog                   | ATGACCTAGGCAAGTCAGCTC   | ATTCATCCAAAAGCCGCACG    |
| <b>Ppara</b>    | Peroxisome proliferator activated receptor alpha | CCCTCGGAGAGGAGATTCC     | GCTGGAGAGAGGGTGTCTGT    |
| <b>Pparg</b>    | Peroxisome proliferator activated receptor gamma | TCGCTGATGCACTGCCTATG    | TGATTCCGAAGTTGGTGGGC    |
| <b>Ppargc1a</b> | PPARG coactivator 1 alfa                         | GGACATGTGCAGCCAAGACTCT  | CACTTCAATCCACCCAGAAAGCT |
| <b>Ucp1</b>     | Uncoupling protein 1                             | GGGCTGATTCTTTTGGTCTCT   | GGGTTGCATTCTCGAAGTTGT   |

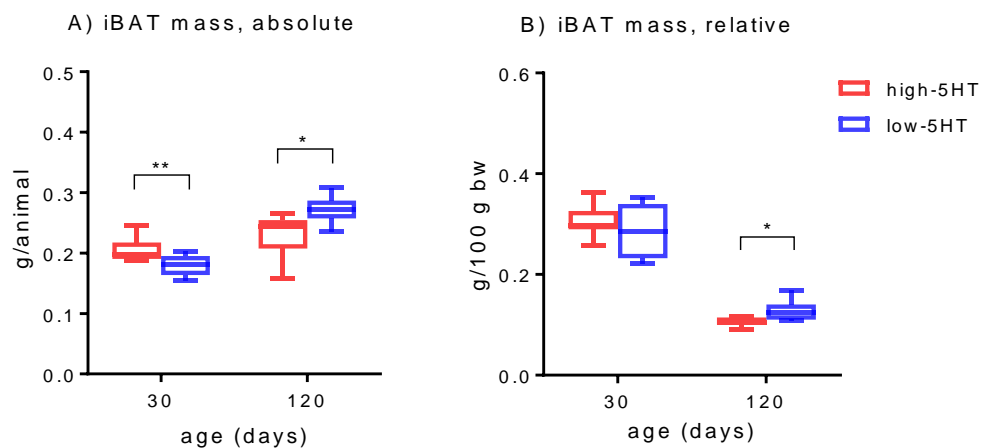

**Figure S1.** Mass of interscapular brown adipose tissue (iBAT) in female animals from high-5HT and low-5HT sublines housed at an ambient temperature of 22°C, expressed as weight per animal (A) or weight per body mass (B). Data are presented as median, interquartile range and min to max; n = 6-9/group; \*p<0.05, \*\*p<0.01, p-values obtained by t-test.

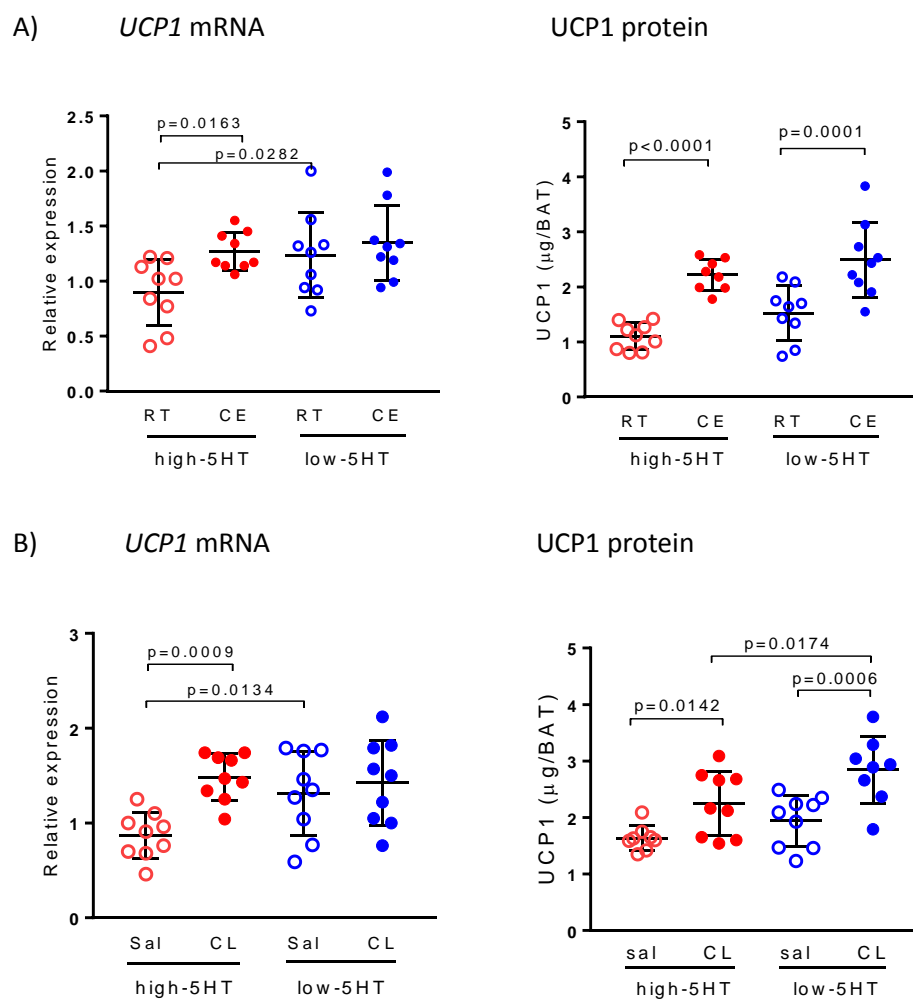

**Figure S2.** UCP1 protein and mRNA levels in BAT of high-5HT and low-5HT animals after **A)** cold exposure and **B)** CL316,214 treatment. Same data as shown in Figures 6 and 8 (cold exposure) and Figures 9 and 10 (CL treatment).
